# Supplementary material for: Single-step synthesis of doped TiO2 stratified thin-films by atmospheric-pressure chemical vapour deposition
Source: Royal Society of Chemistry journal article supplement (doi:10.1039/c4ta00935e), 2014-01-01
Supplement: c4ta00935e1.pdf [file c4ta00935e1.pdf]

## Supporting Information

### Single-step synthesis of doped TiO<sub>2</sub> stratified thin-films by atmospheric pressure chemical vapour deposition

Carlos Sotelo-Vazquez, Raul Quesada-Cabrera\*, Jawwad A. Darr and Ivan P. Parkin\*

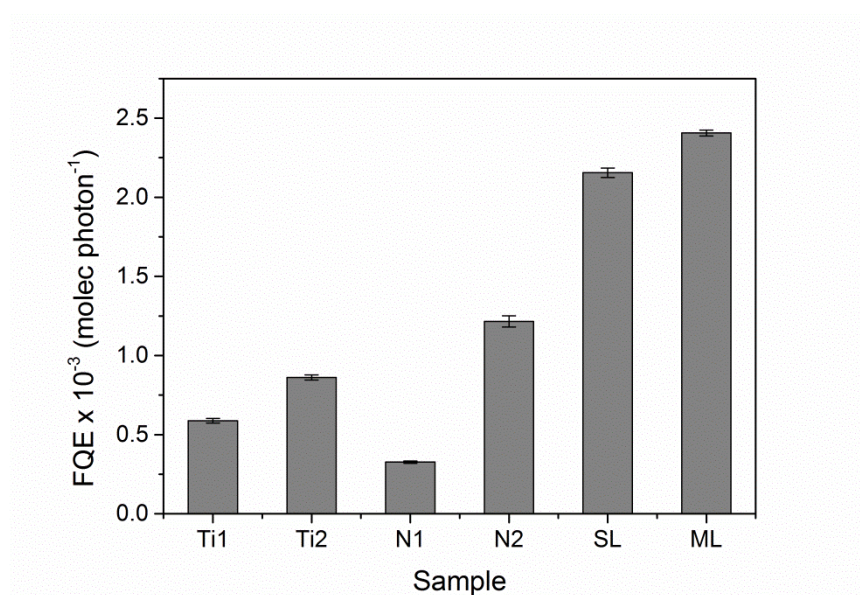

**Figure S1.** Formal quantum efficiencies, estimated as molecules degraded per incident photon, of selected undoped (Ti1, Ti2), non-stratified (N1, N2) and stratified N-doped (SL, ML) TiO<sub>2</sub> thin-films
